# Supplementary material for: Benefits of combined quantitative and qualitative evaluation of learning experience in a gerodontology course for dental students
Source: PubMed Central journal article supplement (PMC7449035; doi:10.1186/s12909-020-02196-0), 2020-08-26
Supplement: 12909_2020_2196_MOESM1_ESM.pdf [file 12909_2020_2196_MOESM1_ESM.pdf]

## Evaluation of learning experience in a gerodontology course

|    | Statement                                                                                                                   | not<br>satisfied<br>at all | very<br>satisfied |
|----|-----------------------------------------------------------------------------------------------------------------------------|----------------------------|-------------------|
| 1  | I am satisfied with the <b>time frame</b> of the course.                                                                    | ○ ○ ○                      | ○ ○ ○             |
| 2  | I <b>do not</b> feel <b>emotionally overwhelmed</b> by the demands of the course.                                           | ○ ○ ○                      | ○ ○ ○             |
| 3  | I am satisfied with the <b>implementation possibilities</b> within the course (e.g. permanent care of the same patient).    | ○ ○ ○                      | ○ ○ ○             |
| 4  | I am satisfied with the <b>supervision</b> provided by the lecturers during the course.                                     | ○ ○ ○                      | ○ ○ ○             |
| 5  | I experience a <b>cooperative collaboration</b> with other professional groups in the nursing homes.                        | ○ ○ ○                      | ○ ○ ○             |
| 6  | I make important <b>human experiences</b> within the course.                                                                | ○ ○ ○                      | ○ ○ ○             |
| 7  | I experience the <b>semester across collaboration</b> as enriching/helpful.                                                 | ○ ○ ○                      | ○ ○ ○             |
| 8  | I am satisfied with the <b>interdisciplinary education</b> (e.g. general medicine).                                         | ○ ○ ○                      | ○ ○ ○             |
| 9  | By participating the course, I acquire <b>new knowledge</b> in dealing with older patients.                                 | ○ ○ ○                      | ○ ○ ○             |
| 10 | By participating the course, I am <b>sensitized</b> to the needs of elderly patients.                                       | ○ ○ ○                      | ○ ○ ○             |
| 11 | By participating the course, I am well <b>prepared for my professional life</b> .                                           | ○ ○ ○                      | ○ ○ ○             |
| 12 | By participating the course, I improve my <b>communicative skills</b> in dealing with elderly patients.                     | ○ ○ ○                      | ○ ○ ○             |
| 13 | By participating the course, I gain new knowledge about the <b>effects of systemic diseases and oral health</b> in old age. | ○ ○ ○                      | ○ ○ ○             |
| 14 | By participating the course, I gain new knowledge about the <b>treatment options</b> for patients with geriatric diseases.  | ○ ○ ○                      | ○ ○ ○             |
| 15 | By participating the course, I improve my <b>social competencies</b> .                                                      | ○ ○ ○                      | ○ ○ ○             |
| 16 | I am <b>generally satisfied</b> with the course.                                                                            | ○ ○ ○                      | ○ ○ ○             |
|    | <p><b>Praise:</b></p><br><p><b>Criticism:</b></p><br><p><b>Suggestions for improvement:</b></p>                             |                            |                   |
